# Supplementary material for: Fluidized-Bed Granulation of Probiotics-Encapsulated Spray-Dried Skim Milk Powder: Effects of a Fluidizing Aid, Moisture-Activation and Dehydration
Source: MDPI journal article supplement (doi:10.3390/foods10071600), 2021-07-09
Supplement: s1 [file s1]

**Table S1**

Geldart classification for particle fluidization [1].

| Group         | Fluidizing behavior                                                                           | $d_{3,2}$ ( $\mu\text{m}$ ) | $\rho$ ( $\text{kg m}^{-3}$ ) |
|---------------|-----------------------------------------------------------------------------------------------|-----------------------------|-------------------------------|
| A (aeratable) | Aeratable and well-fluidizing                                                                 | 30–100                      | < 1,400                       |
| B (sand-like) | No smooth fluidization, bubble formation at the onset of fluidization                         | 40–500                      | 1,400–4,000                   |
| C (fine)      | Very poor fluidization, significant formation of channels                                     | < 20                        | < 1,400                       |
| D (large)     | Largest particles fall in this group, requiring a large amount of gas during the fluidization | > 1,400                     | > 1,400                       |

**Table S2**

Classification of powder flowability according to Car compressibility index (CI) and Hausner ratio (HR) [20].

| CI (%)    | Flow character  | HR        |
|-----------|-----------------|-----------|
| $\leq 10$ | Excellent       | 1.00–1.11 |
| 11–15     | Good            | 1.12–1.18 |
| 16–20     | Fair            | 1.19–1.25 |
| 21–25     | Passable        | 1.26–1.34 |
| 26–31     | Poor            | 1.35–1.45 |
| 32–37     | Very poor       | 1.46–1.59 |
| $>38$     | Very, very poor | $>1.60$   |

**Table S3**

Particle size ( $d_{4,3}$ ) and volume fraction of peaks in particle size distribution of LRP-SMP mixtures and their granules obtained by fluidized-bed granulation. The granules obtained from the LRP:SMP mixture (50:50) were denoted as LRP-G1.

|                                           |              | LRP : SMP (w/w) |                |                |                     |
|-------------------------------------------|--------------|-----------------|----------------|----------------|---------------------|
|                                           |              | 70:30           |                | 50:50          |                     |
|                                           |              | Mixture         | Granule        | Mixture        | Granule<br>(LRP-G1) |
| $d_{4,3}$ (μm)<br>(volume<br>fraction, %) | Peak 1       | 7.01 ± 0.01     | 2.36 ± 0.99    | 1.76 ± 0.01    | 16.01 ± 0.22        |
|                                           |              | (24.73 ± 0.34)  | (4.24 ± 0.09)  | (6.73 ± 0.17)  | (18.39 ± 0.44)      |
|                                           | Peak 2       | 26.60 ± 0.56    | 18.36 ± 0.26   | 27.68 ± 0.26   | 209.03 ± 1.79       |
|                                           |              | (60.07 ± 0.69)  | (35.99 ± 0.46) | (52.41 ± 1.05) | (76.71 ± 0.95)      |
|                                           | Peak 3       | 79.92 ± 2.31    | 370.65 ± 5.62  | 111.74 ± 1.25  | 487.50 ± 0.51       |
|                                           |              | (5.19 ± 1.00)   | (59.78 ± 0.38) | (40.86 ± 1.22) | (4.90 ± 0.51)       |
| Overall                                   | 18.75 ± 0.64 | 95.54 ± 4.11    | 33.70 ± 0.96   | 140.50 ± 3.54  |                     |
| Span                                      |              | 4.25 ± 0.15     | 5.17 ± 0.21    | 5.55 ± 0.17    | 3.49 ± 0.09         |

**Table S4**

Particle size ( $d_{4,3}$ ) and volume fraction of peaks in particle size distribution of LRP-SMP mixture (50:50), moisture-activated LRP-SMP mixture, and the granules obtained by fluidized-bed granulation of moisture-activated LRP-SMP mixture. The granules were denoted as LRP-G2.

|                                                        |         | LRP-SMP mixture                           | Moisture-activated<br>LRP-SMP mixture     | Granules<br>(LRP-G2)                       |
|--------------------------------------------------------|---------|-------------------------------------------|-------------------------------------------|--------------------------------------------|
| $d_{4,3}$ ( $\mu\text{m}$ )<br>(volume<br>fraction, %) | Peak 1  | $1.76 \pm 0.01$<br>( $6.73 \pm 0.17$ )    | —                                         | $33.16 \pm 0.62$<br>( $50.89 \pm 2.16$ )   |
|                                                        | Peak 2  | $27.68 \pm 0.26$<br>( $52.41 \pm 1.05$ )  | $28.29 \pm 0.11$<br>( $56.70 \pm 1.21$ )  | $64.91 \pm 1.04$<br>( $7.66 \pm 0.69$ )    |
|                                                        | Peak 3  | $111.74 \pm 1.25$<br>( $40.86 \pm 1.22$ ) | $119.86 \pm 8.53$<br>( $43.30 \pm 1.21$ ) | $289.87 \pm 62.79$<br>( $41.45 \pm 1.47$ ) |
|                                                        | Overall | $33.70 \pm 0.96$                          | $38.68 \pm 1.46$                          | $74.67 \pm 1.35$                           |
|                                                        | Span    | $5.55 \pm 0.17$                           | $3.89 \pm 0.06$                           | $6.57 \pm 0.33$                            |

**Table S5**

Particle size ( $d_{4,3}$ ) and volume fraction of peaks in particle size distribution of the moisture-activated LRP-SMP mixture (50:50) treated with 5-min or 10-min dehydration at 50 °C or without dehydration.

|                      |         | No dehydration | 5-min dehydration | 10-min dehydration |
|----------------------|---------|----------------|-------------------|--------------------|
| $d_{4,3}$ (μm)       | Peak 1  | 28.29 ± 0.11   | 19.25 ± 0.35      | 26.62 ± 0.26       |
|                      |         | (56.70 ± 1.21) | (49.57 ± 0.38)    | (64.38 ± 1.33)     |
|                      | Peak 2  | 119.86 ± 8.53  | 132.31 ± 3.08     | 151.24 ± 14.23     |
| (volume fraction, %) |         | (43.30 ± 1.21) | (50.43 ± 0.38)    | (35.62 ± 1.33)     |
|                      | Overall | 38.68 ± 1.46   | 42.88 ± 0.48      | 36.25 ± 2.09       |
| Span                 |         | 3.89 ± 0.06    | 4.47 ± 0.07       | 5.87 ± 0.27        |

**Table S6**

Particle size ( $d_{4,3}$ ) and volume fraction of peaks in particle size distribution of the moisture-activated LRP-SMP mixture (50:50) treated with 5-min dehydration before and after fluidized-bed granulation for 8 min or 15 min. The granules from 15-min process were denoted as LRP-G3.

|                                                        |         | Before granulation                        | 8-min granulation                         | 15-min granulation<br>(LRP-G3)             |
|--------------------------------------------------------|---------|-------------------------------------------|-------------------------------------------|--------------------------------------------|
| $d_{4,3}$ ( $\mu\text{m}$ )<br>(volume<br>fraction, %) | Peak 1  | $19.25 \pm 0.35$<br>( $49.57 \pm 0.38$ )  | $19.59 \pm 0.28$<br>( $28.29 \pm 0.61$ )  | $31.06 \pm 0.26$<br>( $3.26 \pm 0.25$ )    |
|                                                        | Peak 2  | $132.31 \pm 3.08$<br>( $50.43 \pm 0.38$ ) | $310.02 \pm 4.41$<br>( $71.71 \pm 0.61$ ) | $301.94 \pm 19.60$<br>( $96.74 \pm 0.25$ ) |
|                                                        | Overall | $42.88 \pm 0.48$                          | $85.82 \pm 1.64$                          | $141.67 \pm 7.41$                          |
|                                                        | Span    | $4.47 \pm 0.07$                           | $2.67 \pm 0.10$                           | $1.68 \pm 0.18$                            |
